# Supplementary material for: Catalytic effect of a single water molecule on the atmospheric reaction of HO2 + OH: fact or fiction? A mechanistic and kinetic study
Source: Royal Society of Chemistry journal article supplement (doi:10.1039/c3ra40341f), 2013-01-01
Supplement: c3ra40341f.pdf [file c3ra40341f.pdf]

## Supporting information

-for-

### Catalytic effect of a single water molecule on atmospheric reaction of HO<sub>2</sub> + OH: Fact or fiction? A mechanistic and kinetic study

Tianlei Zhang<sup>a</sup> Wenliang Wang<sup>\*,a</sup> Chunying Li<sup>b</sup> Yongmei Du<sup>b</sup> Jian Lü<sup>\*,b</sup>

<sup>a</sup>Key Laboratory for Macromolecular Science of Shaanxi Province, School of Chemistry and Chemical Engineering, Shaanxi Normal University, Xi'an, Shaanxi 710062, China

<sup>b</sup>Xi'an Modern Chemistry Research Institute, Xi'an 710065, People's Republic of China

| Figures and Tables |                                                                                                                                                                                                                                                                                                     | Page  |
|--------------------|-----------------------------------------------------------------------------------------------------------------------------------------------------------------------------------------------------------------------------------------------------------------------------------------------------|-------|
| <b>Fig. S1</b>     | Optimized geometries of all the species involved in HO <sub>2</sub> + OH reaction at the CCSD/6-311G(d,p) level.                                                                                                                                                                                    | S2    |
| <b>Fig. S2</b>     | Optimized geometries of all the species involved in the reaction of HO <sub>2</sub> + OH with a water molecule at the CCSD/6-311G(d,p) level.                                                                                                                                                       | S3-S4 |
| <b>Fig. S3</b>     | Pictorial representation of (a) naked formation process of HO <sub>3</sub> H, <sup>1</sup> O <sub>2</sub> and <sup>3</sup> O <sub>2</sub> ; (b) water-catalyzed process of HO <sub>3</sub> H, <sup>1</sup> O <sub>2</sub> and <sup>3</sup> O <sub>2</sub> formation in HO <sub>2</sub> +OH reaction | S5    |
| <b>Table S1</b>    | <i>T</i> <sub>1</sub> diagnostic values and spin contamination for the species that involved in HO <sub>2</sub> + OH reaction without and with a water molecule                                                                                                                                     | S6    |
| <b>Table S2</b>    | The electronic energies ( <i>E</i> ) and the relative energies ( $\Delta E$ ) (in kcal·mol <sup>-1</sup> ) for the HO <sub>2</sub> + OH reaction at the CASSCF/aug-cc-pV5Z//CCSD/6-311G(d,p) level                                                                                                  | S6    |
| <b>Table S3</b>    | Rate constants (cm <sup>3</sup> ·molecule <sup>-1</sup> ·s <sup>-1</sup> ) for the process of HO <sub>3</sub> H formation without and with a water molecule                                                                                                                                         | S7    |
| <b>Table S4</b>    | Kinetic results for the process of <sup>1</sup> O <sub>2</sub> formation occurring through HO <sub>2</sub> ···H <sub>2</sub> O + OH and HO <sub>2</sub> + HO···H <sub>2</sub> O reactions.                                                                                                          | S7    |
| <b>Table S5</b>    | Kinetic results for the process of <sup>3</sup> O <sub>2</sub> formation occurring through HO <sub>2</sub> ···H <sub>2</sub> O + OH and HO <sub>2</sub> + HO···H <sub>2</sub> O reactions.                                                                                                          | S8    |

\* Corresponding authors. Tel: +86-29-81530815, Fax: +86-29-81530727.  
e-mail: wlwang@snnu.edu.cn (W. L. Wang), lujian204@263.net (J. Lü).

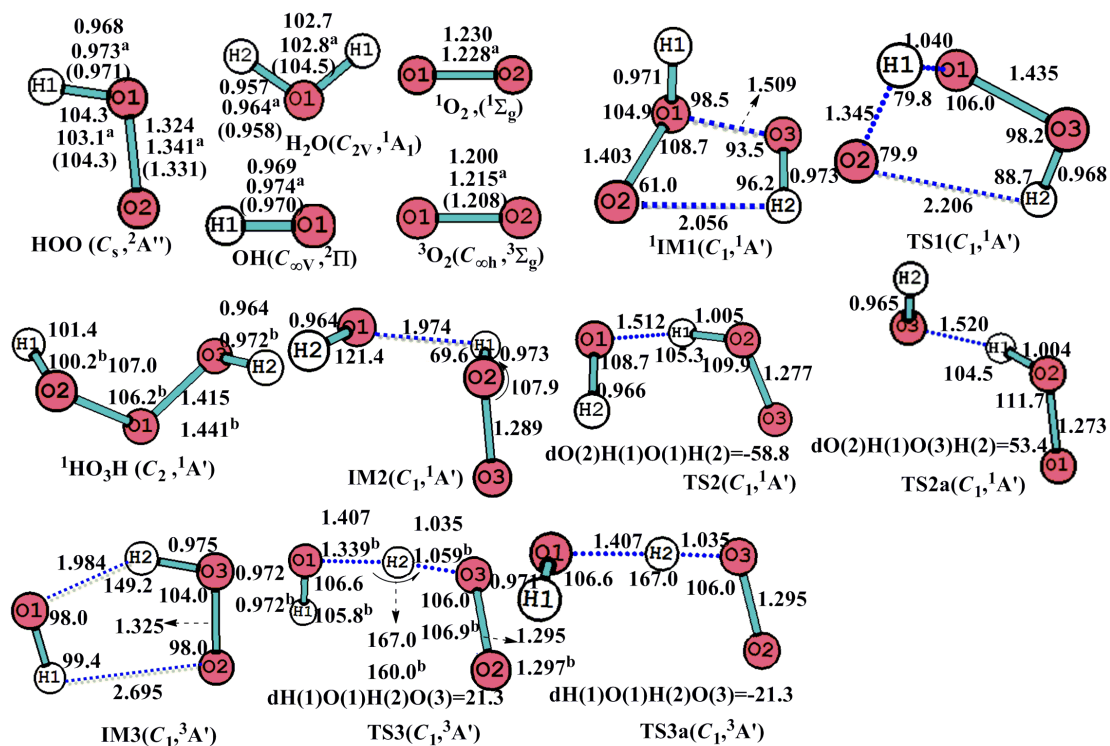

**Fig. S1** Optimized geometries of all the species that involved in the  $\text{HO}_2 + \text{OH}$  reaction at the CCSD/6-311G(d,p) level. Bond lengths are in angstroms and angles are in degrees. The values with parentheses were the experimental data from the NIST chemistry webbook; <sup>a</sup> The values calculated at CASSCF/6-311G(d,p) level, <sup>b</sup> The values calculated at MP2/6-311G(d,p) level and obtained from reference 1 and 2.

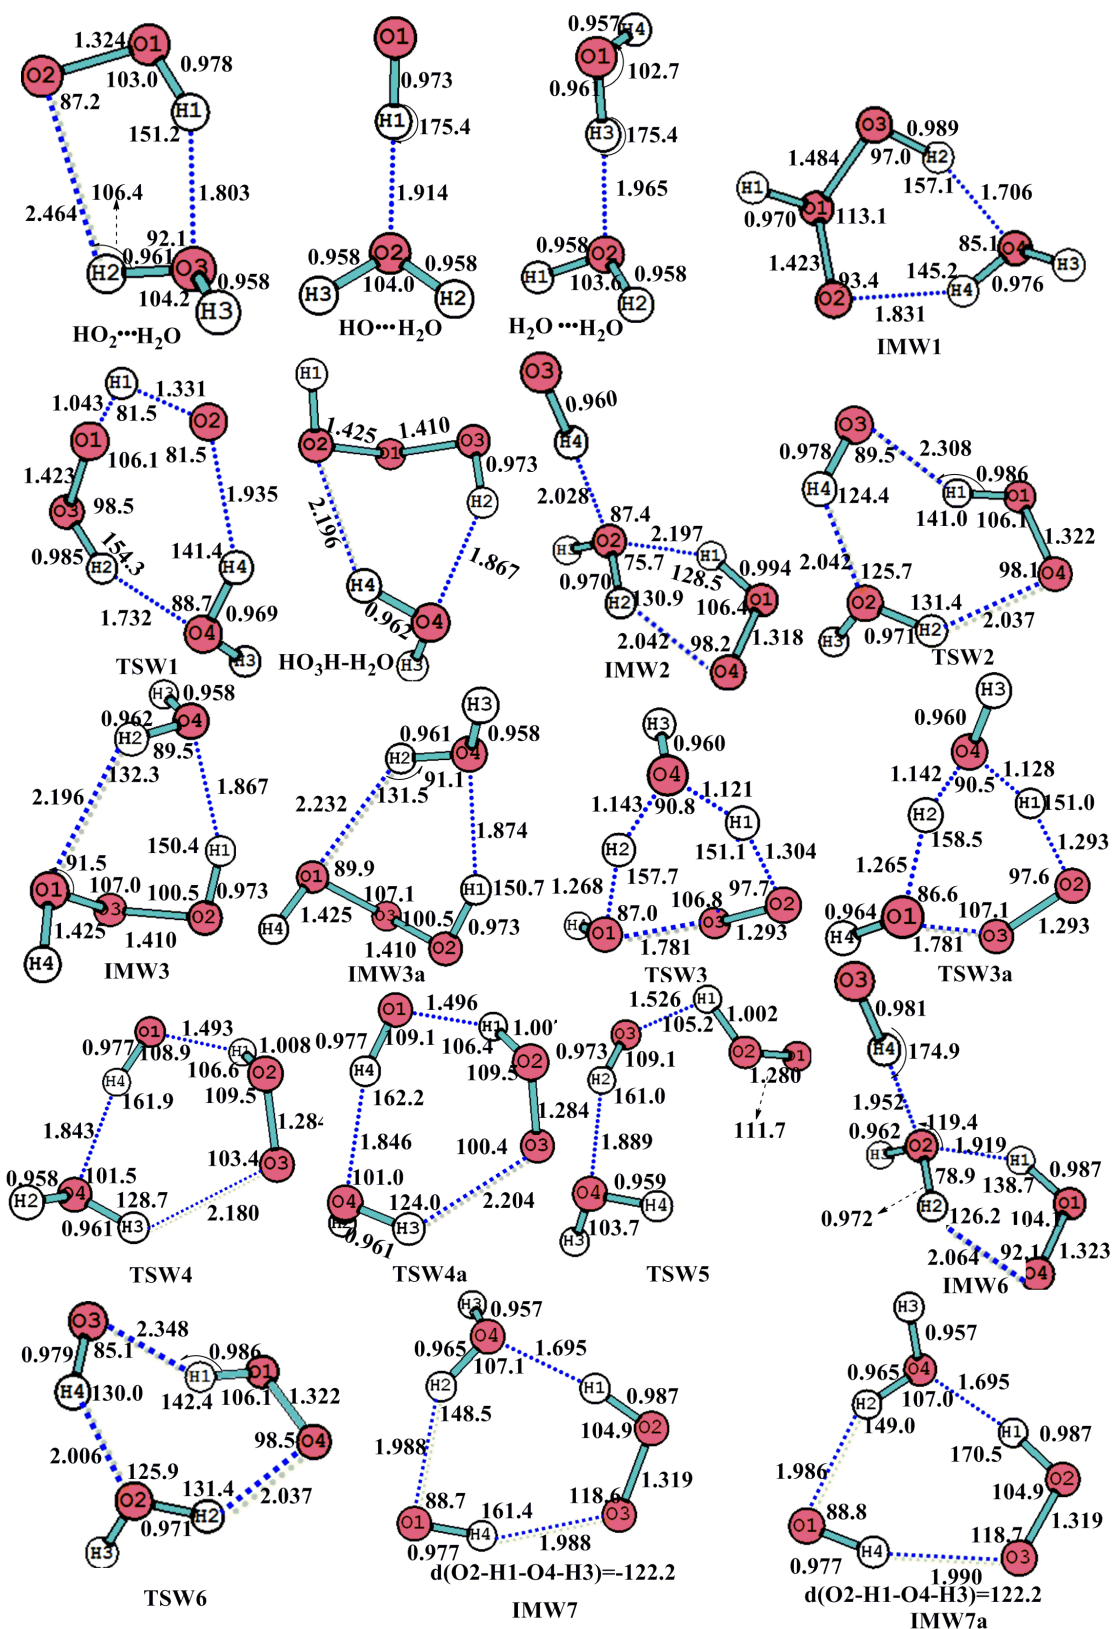

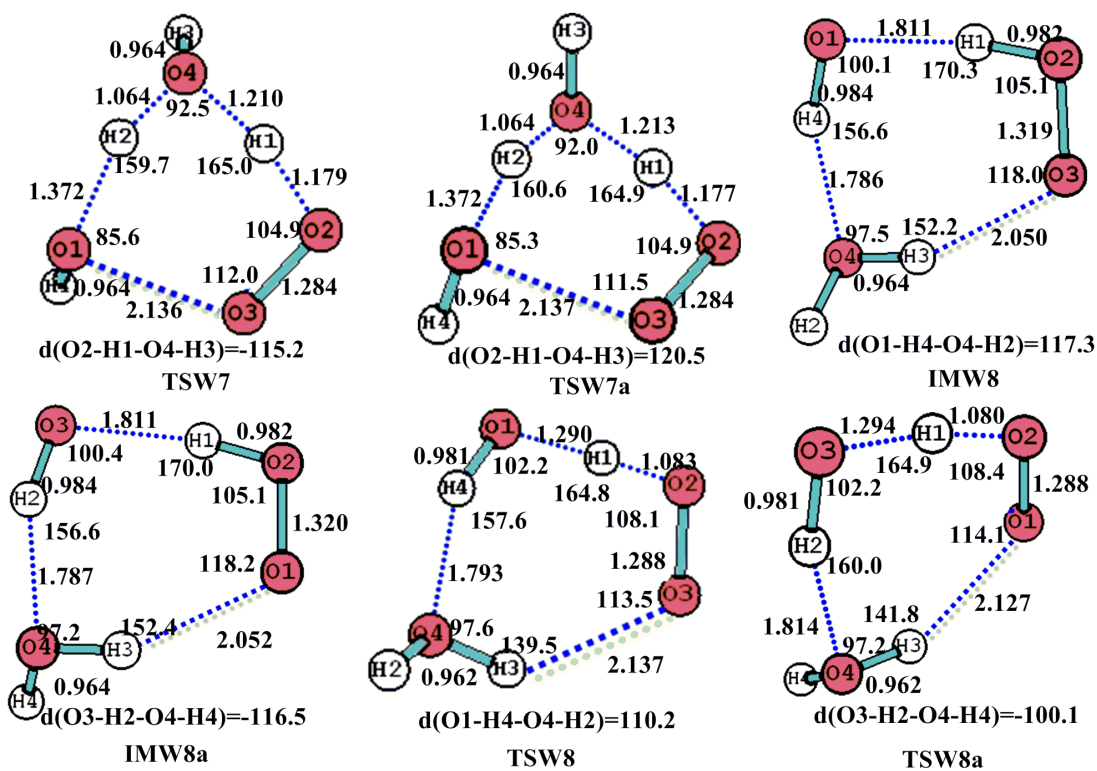

**Fig. S2** Optimized geometries of all the species that involved in the reaction of HO<sub>2</sub> + OH with a water molecule at the CCSD/6-311G(d,p) level. Bond lengths are in angstroms and angles are in degrees.

**a) Naked reaction**

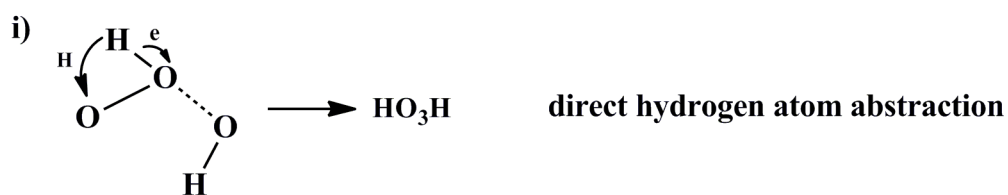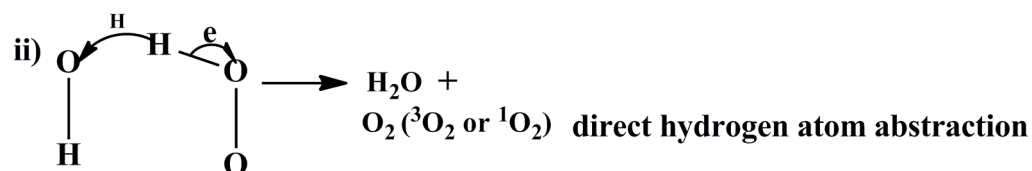

**b) water-catalyzed reaction**

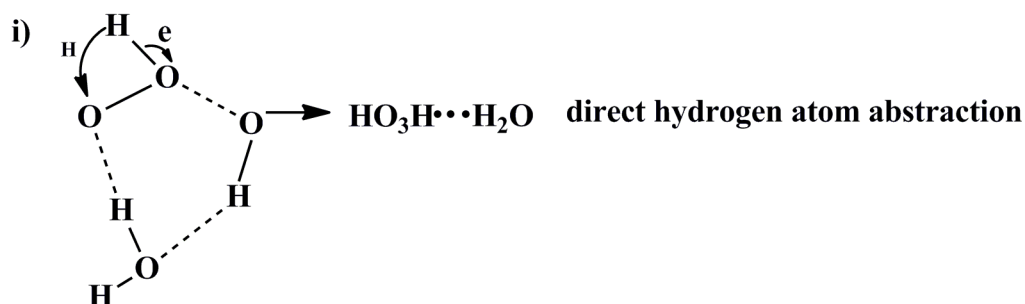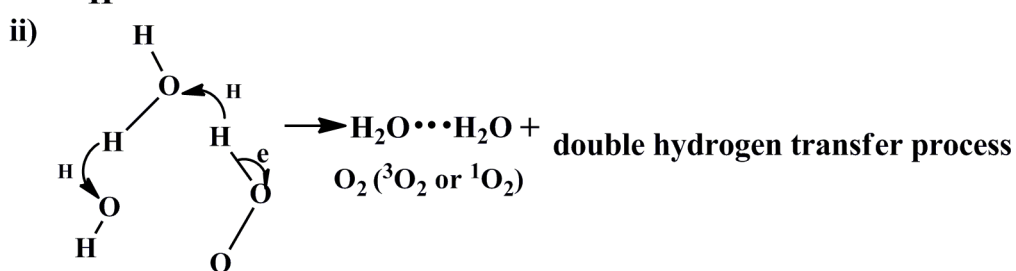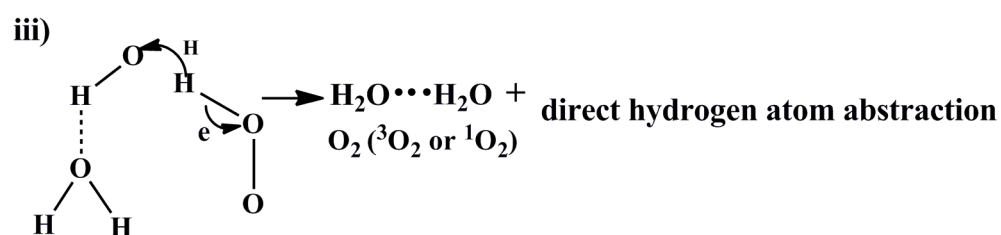

**Fig. S3** Pictorial representation of (a) naked processes of  $\text{HO}_3\text{H}$ ,  $^1\text{O}_2$  and  $^3\text{O}_2$  formation; (b) water-catalyzed processes of  $\text{HO}_3\text{H}$ ,  $^1\text{O}_2$  and  $^3\text{O}_2$  formation in the  $\text{HO}_2 + \text{OH}$  reaction

**Table S1**  $T_1$  diagnostic values and spin contamination for the species that involved in the  $\text{HO}_2 + \text{HO}$  reaction without and with a water molecule

| Species                               | $T_1(\langle S^2 \rangle)$ | Species                                        | $T_1(\langle S^2 \rangle)$ | Species                                 | $T_1(\langle S^2 \rangle)$ |
|---------------------------------------|----------------------------|------------------------------------------------|----------------------------|-----------------------------------------|----------------------------|
| $\text{HO}_2$                         | 0.030(0.7501)              | OH                                             | 0.010 (0.7500)             | $\text{H}_2\text{O}$                    | 0.010(0.0000)              |
| $^1\text{O}_2$                        | 0.015(0.0000)              | $^3\text{O}_2$                                 | 0.017 (2.0006)             | $\text{HO}_2 \cdots \text{H}_2\text{O}$ | 0.029 (0.7500)             |
| $\text{HO} \cdots \text{H}_2\text{O}$ | 0.010(0.7500)              | $\text{H}_2\text{O} \cdots \text{H}_2\text{O}$ | 0.010(0.0000)              | $\text{HO}_3\text{H}$                   | 0.011(0.0000)              |
| IM1                                   | 0.028(0.0000)              | TS1                                            | 0.020(0.0000)              | IM2                                     | 0.018(0.0000)              |
| TS2                                   | 0.022(0.0000)              | TS2a                                           | 0.022(0.0000)              | IM3                                     | 0.037(2.0000)              |
| TS3                                   | 0.035(2.0000)              | TS3a                                           | 0.035(2.0000)              | IMW1                                    | 0.020(0.0000)              |
| TSW1                                  | 0.019(0.0000)              | IMW2                                           | 0.020(0.0000)              | TSW2                                    | 0.019(0.0000)              |
| IMW3                                  | 0.015(0.0000)              | IMW3a                                          | 0.015(0.0000)              | TSW3                                    | 0.020(0.0000)              |
| TSW3a                                 | 0.020(0.0000)              | TSW4                                           | 0.019(0.0000)              | TSW4a                                   | 0.019(0.0000)              |
| TSW5                                  | 0.019(0.0000)              | IMW6                                           | 0.024(2.0000)              | TSW6                                    | 0.024(2.0000)              |
| IMW7                                  | 0.026(2.0000)              | IMW7a                                          | 0.026(2.0000)              | TSW7                                    | 0.040(2.0000)              |
| TSW7a                                 | 0.041(2.0000)              | IMW8                                           | 0.027(2.0000)              | IMW8a                                   | 0.027(2.0000)              |
| TSW8                                  | 0.039(2.0000)              | TSW8a                                          | 0.039(2.0000)              |                                         |                            |

The values with and without parentheses were the  $T_1$  diagnostic values and spin contamination, respectively.

**Table S2** The electronic energies ( $E$ ) and relative energies ( $\Delta E$ ) (in  $\text{kcal}\cdot\text{mol}^{-1}$ ) for the  $\text{HO}_2 + \text{OH}$  reaction at the CASSCF/aug-cc-pV5Z//CCSD/6-311G(d,p) level

| Species                             | $E(\text{a.u.})$ | $\Delta E(\text{a.u.})$ | $\Delta E(\text{kcal}\cdot\text{mol}^{-1})$ |
|-------------------------------------|------------------|-------------------------|---------------------------------------------|
| $\text{HO}_2 + \text{OH}$           | -225.751411      | 0.00                    | 0.00                                        |
| IM1                                 | -225.734933      | 0.016478                | 10.34                                       |
| TS1                                 | -225.714487      | 0.036924                | 23.17                                       |
| $^1\text{HO}_3\text{H}$             | -225.806119      | -0.05471                | -34.33                                      |
| IM2                                 | -225.751204      | 0.000207                | 0.13                                        |
| TS2                                 | -225.749307      | 0.002104                | 1.32                                        |
| TS2a                                | -225.748574      | 0.002837                | 1.78                                        |
| $\text{H}_2\text{O} + ^1\text{O}_2$ | -225.835378      | -0.08397                | -52.69                                      |
| IM3                                 | -225.762216      | -0.0108                 | -6.78                                       |
| TS3                                 | -225.748447      | 0.002964                | 1.86                                        |
| TS3a                                | -225.748447      | 0.002964                | 1.86                                        |
| $\text{H}_2\text{O} + ^3\text{O}_2$ | -225.869911      | -0.118500               | -74.36                                      |

**Table S3** Rate constants ( $\text{cm}^3 \cdot \text{molecule}^{-1} \cdot \text{s}^{-1}$ ) for the process of  $\text{HO}_3\text{H}$  formation without and with a water molecule

| T (K) | $k_{\text{RW1}}$ | $k_{\text{R1}}$ | $k_{\text{RW1}}/k_{\text{R1}}$ |
|-------|------------------|-----------------|--------------------------------|
| 298.2 | 1.324E-36        | 8.747E-33       | 1.51E-04                       |
| 288.2 | 2.147E-36        | 1.221E-32       | 1.76E-04                       |
| 275.2 | 5.745E-36        | 1.645E-31       | 3.49E-05                       |
| 262.2 | 1.601E-35        | 1.606E-30       | 9.97E-06                       |
| 249.3 | 4.618E-35        | 1.187E-29       | 3.89E-06                       |
| 236.3 | 1.358E-35        | 6.816E-28       | 1.99E-08                       |
| 223.3 | 4.009E-34        | 3.088E-27       | 1.30E-07                       |
| 216.7 | 9.131E-34        | 4.932E-26       | 1.85E-08                       |

$k_{\text{RW1}}$  and  $k_{\text{R1}}$  was the rate constants of Channel RW1 and Channel R1, respectively.

**Table S4** Kinetic results for water-catalyzed  $^1\text{O}_2$  formation occurring through  $\text{HO}_2 \cdots \text{H}_2\text{O} + \text{OH}$  and  $\text{HO}_2 + \text{HO} \cdots \text{H}_2\text{O}$  reactions

| T(K)  | $K_{\text{eq}}(\text{IMW2})$ | $k_{\text{IMW3}}$ | $k_{\text{IMW3a}}$ | $k(\text{TSW3})$ | $k(\text{TSW3a})$ | $k_2(\text{RW2a})$ | $k_{\text{RW2a}}$ |
|-------|------------------------------|-------------------|--------------------|------------------|-------------------|--------------------|-------------------|
| 298.2 | 4.06E-25                     | 8.43E+11          | 1.24E+12           | 1.18E+11         | 1.13E+11          | 2.08E+11           | 8.46E-14          |
| 288.2 | 3.96E-25                     | 8.18E+11          | 1.05E+12           | 7.26E+10         | 4.53E+10          | 1.11E+11           | 4.39E-14          |
| 275.2 | 3.90E-25                     | 8.09E+11          | 8.82E+11           | 4.92E+10         | 3.99E+10          | 8.46E+10           | 3.30E-14          |
| 262.2 | 3.76E-25                     | 7.88E+11          | 7.22E+11           | 3.80E+10         | 3.77E+10          | 7.21E+10           | 2.71E-14          |
| 249.3 | 3.66E-25                     | 7.73E+11          | 5.61E+11           | 2.91E+10         | 1.76E+10          | 4.51E+10           | 1.65E-14          |
| 236.3 | 3.53E-25                     | 7.36E+11          | 4.38E+11           | 2.09E+10         | 1.66E+10          | 3.63E+10           | 1.28E-14          |
| 223.3 | 3.39E-25                     | 7.20E+11          | 3.91E+11           | 1.85E+10         | 1.53E+10          | 3.27E+10           | 1.11E-14          |

  

| T(K)  | $k_{\text{RW2b1}}$ | $k_{\text{RW2b2}}$ | $k_{\text{RW2b3}}$ | $k_{\text{RW2b}}$ |
|-------|--------------------|--------------------|--------------------|-------------------|
| 298.2 | 3.16E-19           | 2.11E-19           | 1.34E-19           | 6.61E-19          |
| 288.2 | 2.15E-19           | 1.56E-19           | 9.77E-20           | 4.69E-19          |
| 275.2 | 1.25E-19           | 1.03E-19           | 6.27E-20           | 2.91E-19          |
| 262.2 | 6.98E-20           | 6.56E-20           | 3.89E-20           | 1.74E-19          |
| 249.3 | 4.03E-20           | 3.70E-20           | 2.32E-20           | 1.00E-19          |
| 236.3 | 2.38E-20           | 1.85E-20           | 1.32E-20           | 5.55E-20          |
| 223.3 | 1.34E-20           | 8.74E-21           | 7.19E-21           | 2.93E-20          |

$K_{\text{eq}}(\text{IMW2})$  was the equilibrium constant for the process of  $\text{HO}_2 \cdots \text{H}_2\text{O} + \text{OH} \rightarrow \text{IMW2}$ ;  $k(\text{IMW3})$  and  $k(\text{IMW3a})$  was the rate constant for the process of  $\text{IMW2} \rightarrow \text{TSW2} \rightarrow \text{IMW3}$  and  $\text{IMW2} \rightarrow \text{TSW2} \rightarrow \text{IMW3a}$ , respectively;  $k(\text{TSW3})$  and  $k(\text{TSW3a})$  was the rate constant for the process of  $\text{IMW3} \rightarrow \text{TSW3} \rightarrow \text{H}_2\text{O} \cdots \text{H}_2\text{O} + ^1\text{O}_2$  and  $\text{IMW3a} \rightarrow \text{TSW3a} \rightarrow \text{H}_2\text{O} \cdots \text{H}_2\text{O} + ^1\text{O}_2$ , respectively;  $k_{\text{RW2b1}}$ ,  $k_{\text{RW2b2}}$  and  $k_{\text{RW2b3}}$  was the rate constant for the process of  $\text{HO}_2 \cdots \text{H}_2\text{O} + \text{OH} \rightarrow \text{H}_2\text{O} \cdots \text{H}_2\text{O} + ^1\text{O}_2$  via TSW4, TSW4a and TSW5, respectively.

**Table S5** Kinetic results for water-catalyzed  $^3\text{O}_2$  formation occurring through  $\text{HO}_2\cdots\text{H}_2\text{O} + \text{OH}$  and  $\text{HO}_2 + \text{HO}\cdots\text{H}_2\text{O}$  reactions

| T(K) | $K_{\text{eq}}(\text{IMW6})$ | $k_{\text{IMW7}}$             | $k_{\text{IMW7a}}$ | $k_{\text{TSW7}}$ | $k_{\text{TSW7a}}$ | $k_2(\text{RW3a})$ | $k_{\text{RW3a}}$ |
|------|------------------------------|-------------------------------|--------------------|-------------------|--------------------|--------------------|-------------------|
| 298. | 4.51E-25                     | 9.92E+11                      | 5.28E+11           | 8.44E+09          | 2.03E+10           | 2.82E+10           | 1.27E-1           |
| 288. | 4.66E-25                     | 1.01E+12                      | 5.92E+11           | 8.26E+09          | 2.02E+10           | 2.80E+10           | 1.30E-1           |
| 275. | 4.88E-25                     | 1.05E+12                      | 7.29E+11           | 8.03E+09          | 2.00E+10           | 2.76E+10           | 1.35E-1           |
| 262. | 5.15E-25                     | 1.08E+12                      | 8.80E+11           | 7.79E+09          | 1.98E+10           | 2.72E+10           | 1.40E-1           |
| 249. | 5.47E-25                     | 1.12E+12                      | 1.05E+1            | 7.55E+09          | 1.95E+10           | 2.67E+10           | 1.46E-1           |
| 236. | 5.88E-25                     | 1.15E+12                      | 1.23E+1            | 7.31E+09          | 1.93E+10           | 2.63E+10           | 1.55E-1           |
| 223. | 6.39E-25                     | 1.18E+12                      | 1.42E+1            | 7.07E+09          | 1.91E+10           | 2.59E+10           | 1.66E-1           |
| 216. | 6.77E-25                     | 1.21E+12                      | 1.58E+1            | 6.96E+09          | 1.89E+10           | 2.56E+10           | 1.73E-1           |
| T(K) | $K_{\text{eq}}(\text{IMW8})$ | $K_{\text{eq}}(\text{IMW8a})$ | $k(\text{TSW8})$   | $k(\text{TSW8a})$ | $k_2(\text{RW3b})$ | $k_{\text{RW3b}}$  |                   |
| 298. | 2.84E-23                     | 1.25E-23                      | 3.02E+1            | 4.48E+12          | 7.50E+12           | 1.42E-10           |                   |
| 288. | 4.02E-23                     | 1.75E-23                      | 2.98E+1            | 4.60E+12          | 7.58E+12           | 2.00E-10           |                   |
| 275. | 6.53E-23                     | 2.81E-23                      | 2.92E+1            | 4.82E+12          | 7.74E+12           | 3.26E-10           |                   |
| 262. | 1.11E-22                     | 4.72E-23                      | 2.85E+1            | 5.03E+12          | 7.88E+12           | 5.54E-10           |                   |
| 249. | 2.01E-22                     | 8.37E-23                      | 2.79E+1            | 5.24E+12          | 8.03E+12           | 9.99E-10           |                   |
| 236. | 3.88E-22                     | 1.58E-22                      | 2.71E+1            | 5.43E+12          | 8.14E+12           | 1.91E-09           |                   |
| 223. | 8.06E-22                     | 3.21E-22                      | 2.64E+1            | 5.62E+12          | 8.26E+12           | 3.93E-09           |                   |
| 216. | 1.28E-21                     | 5.02E-22                      | 2.60E+1            | 5.76E+12          | 8.36E+12           | 6.22E-09           |                   |

$K_{\text{eq}}(\text{IMW6})$  was the equilibrium constant for the process of  $\text{HO}_2\cdots\text{H}_2\text{O} + \text{OH} \rightarrow \text{IMW6}$ ;  $k_{\text{IMW7}}$  and  $k_{\text{IMW7a}}$  was the rate constant for the process of  $\text{IMW6} \rightarrow \text{TSW6} \rightarrow \text{IMW7}$  and  $\text{IMW6} \rightarrow \text{TSW7} \rightarrow \text{IMW7a}$  respectively;  $k_{\text{TSW7}}$  and  $k_{\text{TSW7a}}$  was the rate constant for the process of  $\text{IMW7} \rightarrow \text{TSW7} \rightarrow \text{H}_2\text{O}\cdots\text{H}_2\text{O} + ^3\text{O}_2$  and  $\text{IMW7a} \rightarrow \text{TSW7a} \rightarrow \text{H}_2\text{O}\cdots\text{H}_2\text{O} + ^3\text{O}_2$  respectively;  $k_2(\text{RW3a})$  was the rate constant for the process of  $\text{IMW6} \rightarrow \text{H}_2\text{O}\cdots\text{H}_2\text{O} + ^3\text{O}_2$ ;  $K_{\text{eq}}(\text{IMW8})$  and  $K_{\text{eq}}(^3\text{IMW8a})$  was the equilibrium constant for the process of  $\text{HO}_2\cdots\text{H}_2\text{O} + \text{HO} \rightarrow \text{IMW8}$  and  $\text{HO}_2\cdots\text{H}_2\text{O} + \text{HO} \rightarrow \text{IMW8a}$ , respectively;  $k(\text{TSW8})$  and  $k(\text{TSW8a})$  was the rate constant for the process of  $\text{IMW8} \rightarrow \text{TSW8} \rightarrow \text{H}_2\text{O}\cdots\text{H}_2\text{O} + ^3\text{O}_2$  and  $\text{IMW8a} \rightarrow \text{TSW8a} \rightarrow \text{H}_2\text{O}\cdots\text{H}_2\text{O} + ^3\text{O}_2$ , respectively.

#### References

- 1 C. Gonzalez, J. Theisen, L. Zhu, H. B. Schlegel, W. L. Hase and E. W. Kaiser, *J. Phys. Chem.*, 1991, **95**, 6784-6792.
- 2 C. Gonzalez, J. Theisen, H. B. Schlegel, W. L. Hase and E. W. Kaiser, *J Phys Chem*, 1992, **96**, 1767-1774.
